# Supplementary material for: Impacts of long-range transported mineral dust on summertime convective cloud and precipitation: a case study over the Taiwan region
Source: Copernicus journal article supplement (doi:10.5194/acp-2021-374), 2021-06-07
Supplement: Supplementary file 1 [file acp-2021-374-supplement.pdf]

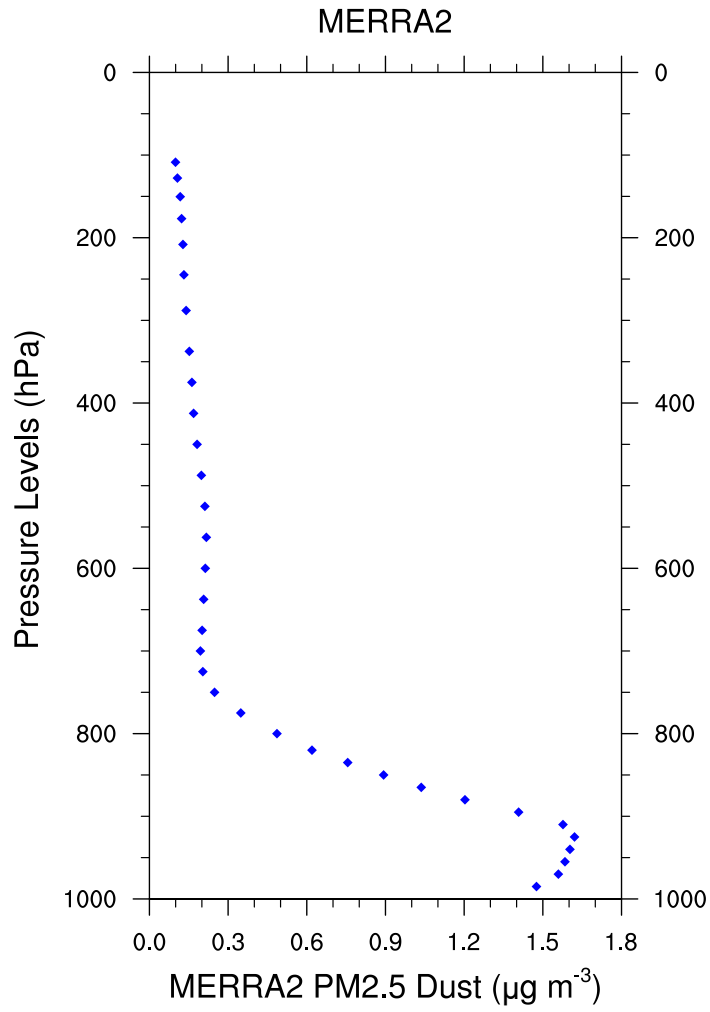

**Figure S1.** Vertical profile of MERRA-2 PM2.5 dust mixing ratio on 2006-07-08.

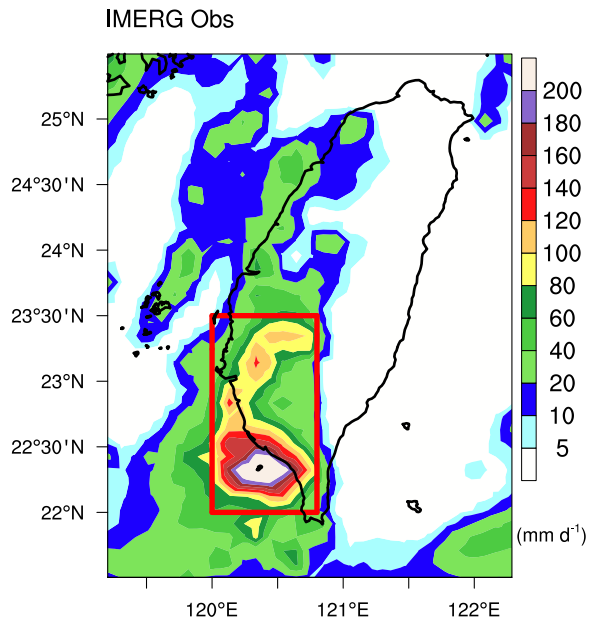

**Figure S2.** 24-hour accumulated precipitation ( $r_{24h}$ ) (LT 2006-07-08) observations from IMERG observation.

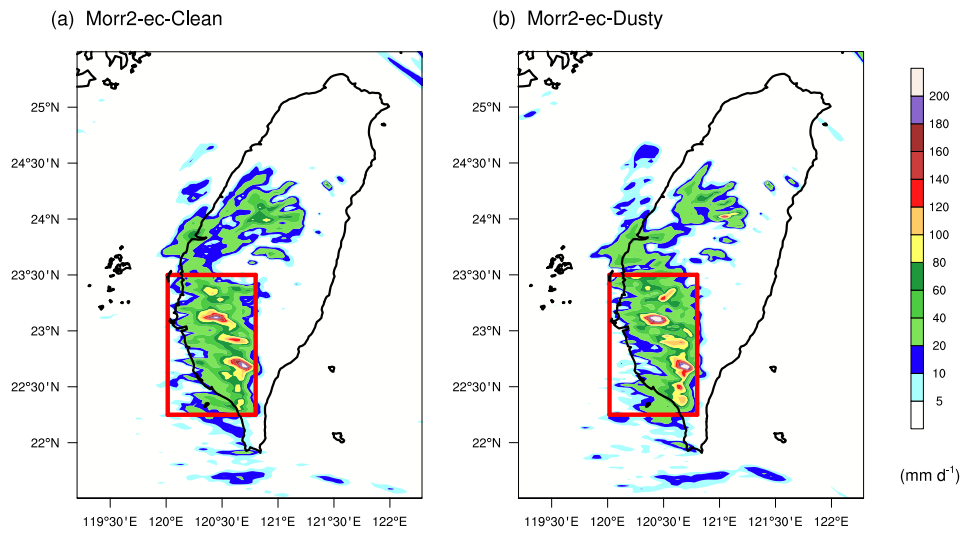

**Figure S3.** 24-hour accumulated precipitation (LT 2006-07-08) simulations from (a) Morr2-ec-Clean and (b) Morr2-ec-Dusty.

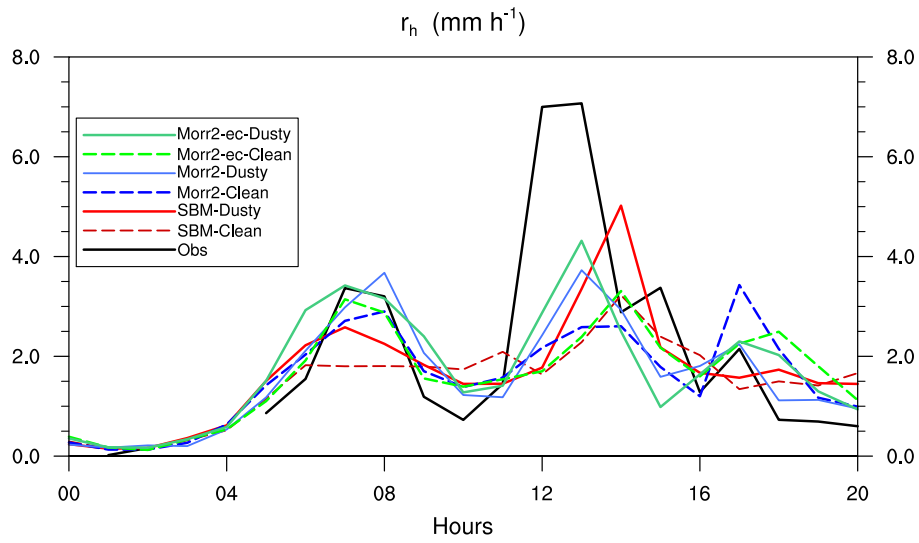

**Figure S4.** Hourly rainfall rates from IMERG observation (black line) and six numerical runs (colored lines) (LT 00:00–20:00, 2006-07-08), averaged among rainfall grids ( $> 0 \text{ mm hr}^{-1}$ ) in the High-Pcp area.
